# Supplementary material for: CIRBP Ameliorates Neuronal Amyloid Toxicity via Antioxidative and Antiapoptotic Pathways in Primary Cortical Neurons
Source: Hindawi journal article supplement (doi:10.1155/2020/2786139), 2020-02-27
Supplement: f1 [file 2786139.f1.pdf]

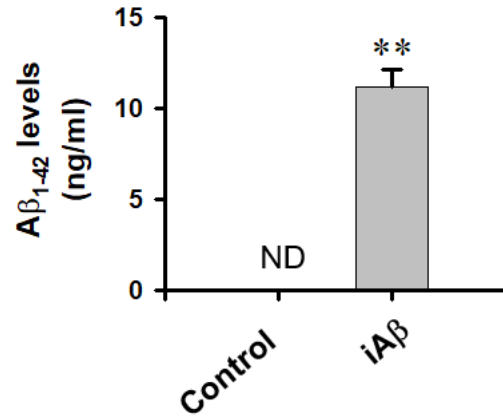

Supplemental Figure 1. The production of Aβ<sub>1-42</sub> in the cultured rat cortical neurons after the infection of recombinant adenoviruses at the MOI of 0.1. ND: no detection. \*\*p<0.01 vs Control.

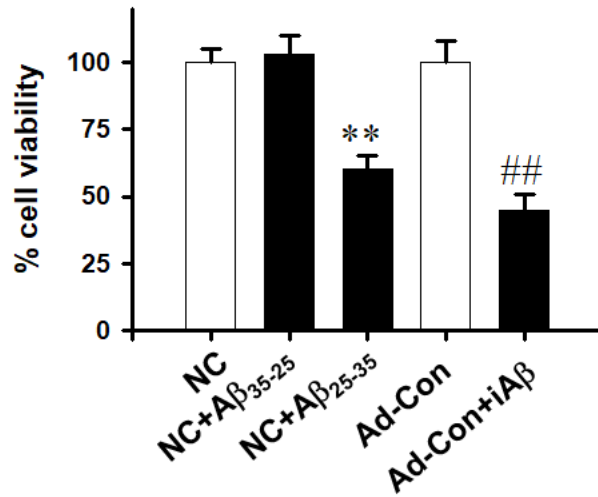

Supplemental Figure 2. MTT results showed no toxicity in the control peptide Aβ<sub>35-25</sub>, and more toxicity is in the intraneuronal Aβ<sub>1-42</sub> than Aβ<sub>25-35</sub>. \*\*p<0.01 vs NC, ## p<0.01 vs NC+Aβ<sub>25-35</sub>.
